# Supplementary material for: One-Step Synthesis of the Nitrogen and Sulfur Codoped Carbon Dots for Detection of Lead and Copper Ions in Aqueous Solution
Source: Hindawi journal article supplement (doi:10.1155/2020/8828456), 2020-11-24
Supplement: f1 [file 8828456.f1.zip]

Archive with 2 entries (2 files):
- Revised Supporting information1.doc
- Revised Supporting information1-with the concise description.doc
